# Supplementary material
Source: PubMed Central journal article supplement (PMC7011570)

SUPPLEMENTARY DATA

**Supplementary Figure 1. Related to Fig 1. RFP-positive Glu-Cre cells overlap with Glu-YFP cells, but not Phox2b-expressing cells.**

(A) GFP- and RFP-immunoreactivity in the NTS of the result of crossbreeding Glu-YFP and Glu-Cre/tdRFP mice, demonstrating clear overlap between these neuronal populations. Scale: 100  $\mu$ m. Right panel: Percentage of RFP-positive cells also expressing YFP (left) as well as RFP-positive cells *not* expressing YFP (right) throughout the NTS. Data given as mean $\pm$ SEM, n=3 mice. (B) RFP-immunoreactivity and Phox2b-dependent expression of EGFP in the NTS of Glu-Cre/tdRFP mice injected with PRSx8-AlstR-EGFP-LV. Scale: 100  $\mu$ m. N=3 mice.

A

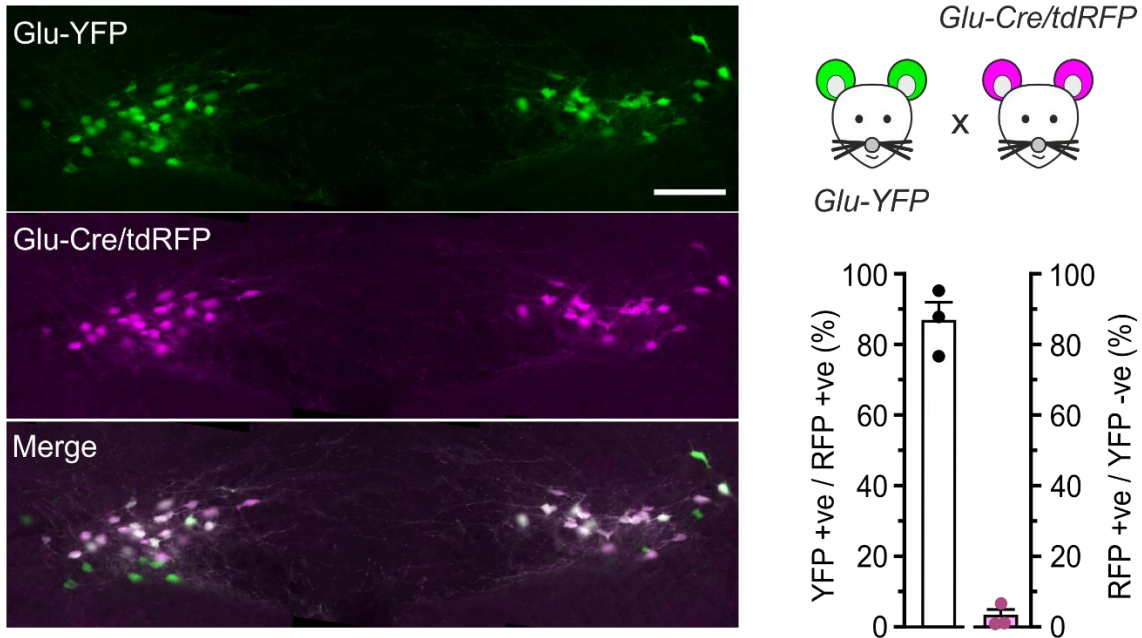

B

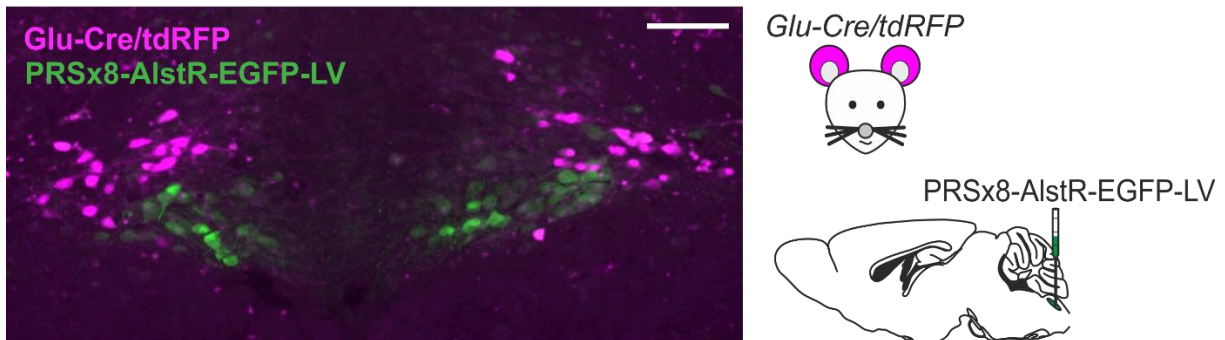

SUPPLEMENTARY DATA

**Supplementary Figure 2. Related to Fig 1. hM<sub>3</sub>Dq lacks intrinsic activity on food intake.**

(A) Schematic showing injection of AAV2-FLEX-hM<sub>3</sub>Dq:mCherry or AAV1/2-FLEX-Perceval into the NTS of Glu-Cre mice. (B) Expression of tdRFP and Perceval (detected with an anti-GFP antibody). Scale: 100 μm. (C) Non-cumulative chow intake of Glu-Cre mice expressing Perceval or hM<sub>3</sub>Dq in the first two hours after dark onset following injection of 2 mg/kg CNO i.p. 30 mins prior to dark onset. Data given as mean±SEM, n=4 (Control), n=4 (hM<sub>3</sub>Dq). There was a significant virus × drug interaction at both hour 0-1 (F(1, 6)=17.19, p=0.006) and hour 1-2 (F(1, 6)=8.65, p=0.026) and a significant effect of CNO in the hM<sub>3</sub>Dq group in hour 0-1 (p=0.0038) and in hour 1-2 (p=0.024), but no effect of CNO in the control group in hour 0-1 (p=0.81) or hour 1-2 (p=0.82) (Sidak's multiple comparisons test). \*: p<0.05; \*\*: p<0.01; n.s.: not significant.

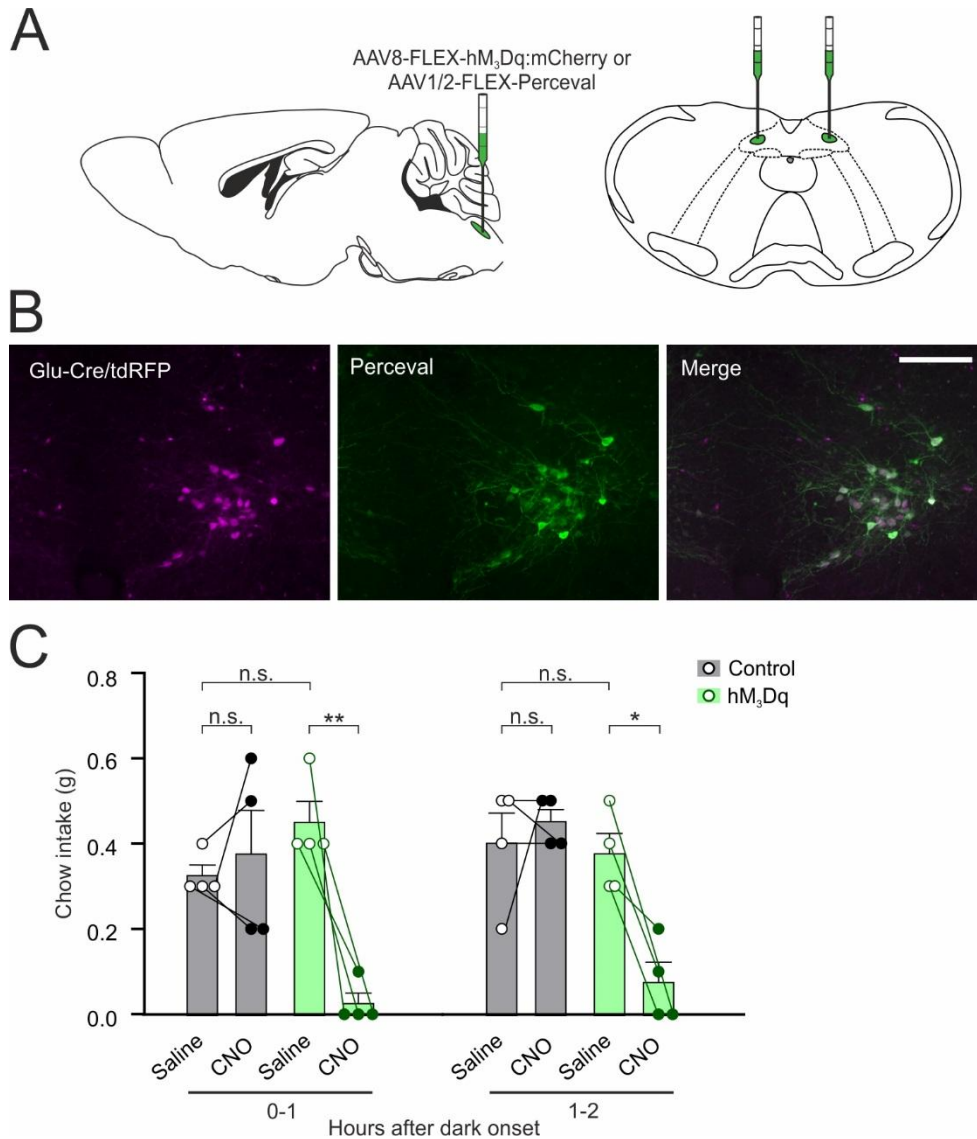

SUPPLEMENTARY DATA

**Supplementary Figure 3. Related to Fig 3. Glucose tolerance before PPG ablation.**

(A-B) Blood glucose in response to an i.p. injection of glucose (1 g/kg) at t=0 prior to stereotaxic injection of -DTA or control virus in six male (A) and six female (B) Glu-Cre mice. Area under the curve (AUC) of the i.p. glucose tolerance test for each group is given on the right of each graph. Data given as mean±SEM.

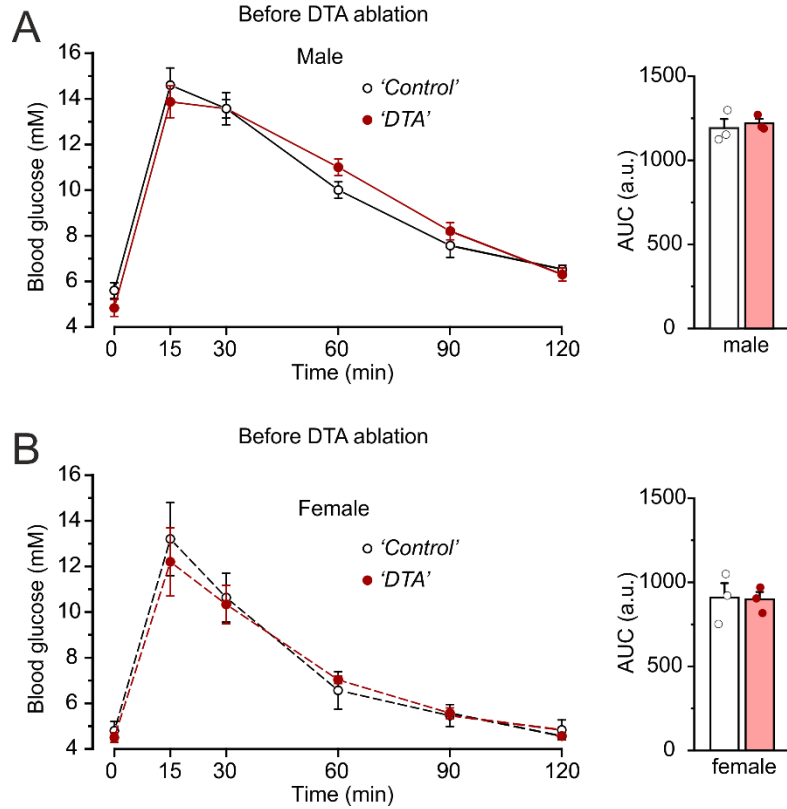

SUPPLEMENTARY DATA

**Supplementary Figure 4. Related to Fig 4. hM<sub>4</sub>Di lacks intrinsic activity on body weight and food intake.**

(A) Change in bodyweight following stereotaxic injection of AAV2-FLEX-hM<sub>4</sub>Di (n=13) or AAV2-FLEX-EGFP (n=11, control). There was a significant virus × time interaction (F(23, 506)=2.93, p=0.0001), but no significant difference between groups at any timepoint (Sidak’s multiple comparisons test). (B-D) Cumulative (B-C) and non-cumulative (D) chow intake in the first four hours (B,D) and 21 hours (C) after dark onset. Mice were expressing either hM<sub>4</sub>Di or EGFP in NTS PPG neurons and were injected with 2 mg/kg CNO i.p. 30 mins prior to dark onset. Data given as mean±SEM, n=11 (control), n=12 (hM<sub>4</sub>Di). B: There was no significant drug × time interaction for either the control (F(2, 20)=0.086, p=0.92) or hM<sub>4</sub>Di group (F(2, 22)=0.036, p=0.96), and there was no significant main effect of CNO in the control (F(1, 10)=0.22, p=0.65) or in the hM<sub>4</sub>Di group (F(1, 11)=0.11, p=0.74). C: There was no significant drug × virus interaction (F(1, 20)=0.22, p=0.65) and no main effect of CNO (F(1, 20)=0.47, p=0.5) or virus (F(1, 20)=0.11, p=0.75). D: No significant drug × virus interactions (Hour 0-1: (F(1, 21)=0.18, p=0.67), hour 1-2: (F(1, 21)=0.011, p=0.92), and hours 2-4 (F(1, 19)=1.30, p=0.27)). n.s.: not significant.

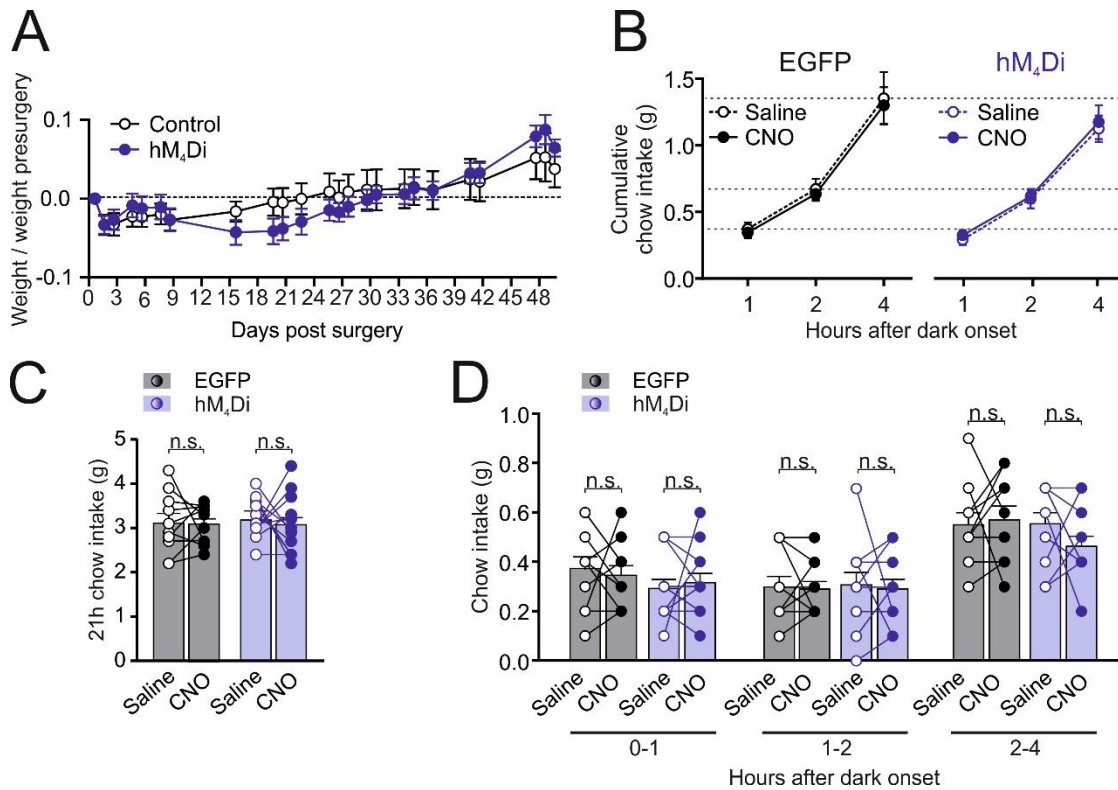

Supplement: DB180729SupplementaryData.pdf [file DB180729SupplementaryData.pdf]
